# Supplementary material for: Nitrogen Fixation in Thermophilic Chemosynthetic Microbial Communities Depending on Hydrogen, Sulfate, and Carbon Dioxide
Source: PubMed Central journal article supplement (PMC5877335; doi:10.1264/jsme2.me17134), 2018-03-29
Supplement: 33_10_s1.pdf [file 33_10_s1.pdf]

**Table S1**

Relative abundance and close relatives of some OTUs ( $\geq 0.2\%$  of total reads at least in one of the communities).

"0.00%" implies no reads detected. Uncultured/environmental sample sequences were included in descriptions if 16S rRNA gene sequence identity was below 90% nt to any known species.

| Phylum                       | OTUs        | Relative abundance |             | Descriptions (Accession No.)                                                                                                                                                       | Identity (%)                                                                                                                  |
|------------------------------|-------------|--------------------|-------------|------------------------------------------------------------------------------------------------------------------------------------------------------------------------------------|-------------------------------------------------------------------------------------------------------------------------------|
|                              |             | Wall Site          | Steram Site |                                                                                                                                                                                    |                                                                                                                               |
| <i>Acidobacteria</i>         | denovo34541 | 0.00%              | 0.32%       | Uncultured Acidobacteria bacterium clone YNP_SBC_BP4_B26 (HM448257)                                                                                                                | 96.4%                                                                                                                         |
|                              |             |                    |             |                                                                                                                                                                                    | <i>Stenotrophobacter roseus</i> strain Ac_15_C4 (NR_146022), <i>Stenotrophobacter namibiensis</i> strain Ac_17_F2 (NR_146021) |
| <i>Aquificae</i>             | denovo14971 | 65.4%              | 50.3%       | <i>Sulfurihydrogenibium azorense</i> Az-Fu1 (NR_102858), <i>Sulfurihydrogenibium kristjanssonii</i> I6628 (NR_042660)                                                              | 100%                                                                                                                          |
|                              | denovo48891 | 5.65%              | 11.30%      | <i>Thermocrinis ruber</i> strain DSM 23557 (CP007028)                                                                                                                              | 96.0%                                                                                                                         |
|                              | denovo14492 | 1.17%              | 0.37%       | <i>Sulfurihydrogenibium azorense</i> Az-Fu1 (NR_102858)                                                                                                                            | 96.8%                                                                                                                         |
|                              | denovo15700 | 0.59%              | 0.18%       | <i>Hydrogenobacter subterraneus</i> HGP1 (NR_024729), <i>Thermothrix azorenensis</i> strain TM (NR_104832)                                                                         | 99.6%                                                                                                                         |
|                              | denovo18902 | 0.31%              | 0.36%       | <i>Thermocrinis ruber</i> DSM 23557 (CP007028), <i>Thermocrinis ruber</i> OC 1/4 (NR_121741)                                                                                       | 94.1%                                                                                                                         |
|                              | denovo53671 | 0.23%              | 0.05%       | <i>Sulfurihydrogenibium azorense</i> Az-Fu1 (NR_102858)                                                                                                                            | 98.4%                                                                                                                         |
|                              | denovo50041 | 0.22%              | 0.07%       | <i>Sulfurihydrogenibium azorense</i> Az-Fu1 (NR_102858)                                                                                                                            | 98.4%                                                                                                                         |
|                              | denovo26756 | 0.21%              | 0.03%       | <i>Sulfurihydrogenibium azorense</i> Az-Fu1 (NR_102858)                                                                                                                            | 97.2%                                                                                                                         |
|                              | denovo29919 | 0.08%              | 0.20%       | <i>Thermocrinis jamiesonii</i> GBS1 (NR_145905), <i>Hydrogenobacter subterraneus</i> strain HGP1 (NR_024729)                                                                       | 96.4%                                                                                                                         |
| <i>Armatimonadetes</i>       | denovo15330 | 0.00%              | 2.48%       | Uncultured Armatimonadetes bacterium, clone: ST-B09_1 (AB735180)                                                                                                                   | 100%                                                                                                                          |
|                              |             |                    |             | <i>Pelotomaculum thermopropionicum</i> strain SI (NR_074685)                                                                                                                       | 87.3%                                                                                                                         |
|                              | denovo36368 | 0.00%              | 0.48%       | Uncultured bacterium clone NKB_56_N2 (JF826973)<br><i>Carboxydotherrnus islandicus</i> strain SET IS-9 (NR_108577), <i>Thermoterrabacterium ferrireducens</i> (U76364)             | 100%<br>86.8%                                                                                                                 |
| <i>Chlorobi</i>              | denovo54962 | 0.01%              | 0.98%       | Uncultured Chlorobi bacterium DNA, fosmid clone: JFF027_B02 (AP011715)<br><i>Rhodothermus clarus</i> (AB252420), <i>Rhodothermus marinus</i> (AY986798)                            | 99.6%<br>88.4%                                                                                                                |
|                              |             |                    |             |                                                                                                                                                                                    | <i>Dictyoglomus turgidum</i> DSM 6724 (CP001251)                                                                              |
| <i>Dictyoglomi</i>           | denovo10055 | 0.28%              | 0.11%       |                                                                                                                                                                                    |                                                                                                                               |
| <i>Firmicutes</i>            | denovo9761  | 0.49%              | 0.01%       | <i>Caldicellulosiruptor lactoaceticus</i> 6A (NR_074772), <i>Caldicellulosiruptor kristjanssonii</i> I77R1B (NR_074768),<br><i>Caldicellulosiruptor acetigenus</i> X6B (NR_115321) | 100%                                                                                                                          |
|                              |             |                    |             |                                                                                                                                                                                    | <i>Caldimicrobium rimae</i> DS (NR_044283)                                                                                    |
| <i>Thermodesulfobacteria</i> | denovo20616 | 1.08%              | 0.21%       |                                                                                                                                                                                    |                                                                                                                               |
|                              | denovo155   | 0.42%              | 0.04%       | <i>Caldimicrobium thiodismutans</i> (LC055107)                                                                                                                                     | 100%                                                                                                                          |
| <i>Thermotogae</i>           | denovo34660 | 1.01%              | 0.00%       | <i>Fervidobacterium nodosum</i> Rt17-B1 (NR_074093)                                                                                                                                | 100%                                                                                                                          |
| <i>Thermotogae</i> (EM3)     | denovo46213 | 0.00%              | 1.15%       | Uncultured Bacteroidetes bacterium clone HGM-U-2 (AB539622)                                                                                                                        | 98.0%                                                                                                                         |
|                              |             |                    |             | <i>Actinomadura rayongensis</i> strain RY35-68 (NR_134688)                                                                                                                         | 82.7%                                                                                                                         |
|                              |             |                    |             | Uncultured bacterium clone NKB_56_T2 (JF826975)<br><i>Actinomadura atramentaria</i> strain DSM 43919 (NR_114850)                                                                   | 77.1%<br>82.3%                                                                                                                |
| <i>Thermus</i>               | denovo18496 | 2.17%              | 3.69%       | <i>Thermus arciformis</i> TH92 (NR_116251)                                                                                                                                         | 100%                                                                                                                          |
| uncultured division          | denovo56209 | 0.02%              | 0.67%       | Uncultured bacterium clone NKB_56_V 16S ribosomal RNA gene                                                                                                                         | 99.6%                                                                                                                         |
|                              |             |                    |             | <i>Thermoanaerobacter cellulolyticus</i> IFO 14436 (L09183)                                                                                                                        | 81.7%                                                                                                                         |
